# Supplementary material for: Kinetics of the reactions between [S2MoS2Cu(SC6H4R-4)]2–(R = MeO, H, Cl or NO2) and CN–: substitution mechanism at a 3-coordinate CuI site
Source: Royal Society of Chemistry journal article supplement (doi:10.1039/b508389c), 2005-01-01
Supplement: b508389c-1.pdf [file b508389c-1.pdf]

### SUPPLEMENTARY DATA

TABLE 1

Kinetic Data for the Reactions of  $[S_2MoS_2Cu(SC_6H_4R-4)]^{2-}$  (R = MeO, H, Cl or  $NO_2$ ) with  $CN^-$  in MeCN at 25.0 °C. Wavelength = 470 nm

| [MoCu] / mmol dm <sup>-3</sup> | [CN <sup>-</sup> ] / mmol dm <sup>-3</sup> | $k_{obs} / s^{-1}$  |        |       |         |
|--------------------------------|--------------------------------------------|---------------------|--------|-------|---------|
|                                |                                            | R = NO <sub>2</sub> | R = Cl | R = H | R = MeO |
| 0.05                           | 1.0                                        | 33.0                | 25.2   | 18.9  | 17.3    |
|                                | 2.0                                        | 52.2                | 33.0   | 23.4  | 19.2    |
|                                | 4.0                                        | 73.3                | 48.0   | 27.8  | 23.3    |
|                                | 5.0                                        | 85.0                | 52.2   | 31.3  | 25.7    |
|                                | 12.0                                       |                     | 97.0   | 50.2  | 40.3    |
|                                | 20.0                                       |                     |        | 79.0  | 58.2    |
| 0.013                          | 5.0                                        |                     |        | 32.5  |         |
| 0.025                          | 5.0                                        |                     |        | 35.3  |         |
| 0.10                           | 5.0                                        |                     |        | 27.8  |         |
| 0.20                           | 5.0                                        |                     |        | 31.6  |         |

## SUPPLEMENTARY DATA

TABLE 2

Kinetic Data for the effect of Temperature on the Reaction of  $[\text{S}_2\text{MoS}_2\text{Cu}(\text{SC}_6\text{H}_5)]^{2-}$  with  $\text{CN}^-$  in MeCN. Wavelength = 470 nm

| [MoCu] / mmol dm <sup>-3</sup> | [CN <sup>-</sup> ] / mmol dm <sup>-3</sup> | $k_{\text{obs}} / \text{s}^{-1}$ |        |        |        |
|--------------------------------|--------------------------------------------|----------------------------------|--------|--------|--------|
|                                |                                            | T = 15                           | T = 20 | T = 30 | T = 35 |
| 0.05                           | 2.0                                        | 10.2                             | 17.0   | 18.3   | 22.2   |
|                                | 5.0                                        | 21.2                             | 23.0   | 24.2   | 29.3   |
|                                | 7.5                                        | 27.0                             | 28.3   | 31.7   | 36.3   |
|                                | 10.0                                       | 31.2                             | 37.3   | 40.8   | 47.0   |
|                                | 12.0                                       | 34.2                             | 39.3   | 45.2   | 49.4   |

**SUPPLEMENTARY DATA**

**TABLE 3**

Kinetic Data showing the Effect of  $\text{C}_6\text{H}_5\text{S}^-$  on the Reaction between  $[\text{S}_2\text{MoS}_2\text{Cu}(\text{SC}_6\text{H}_5)]^{2-}$  and  $\text{CN}^-$  in MeCN at 25.0 °C. Wavelength = 470 nm

| $[\text{MoCu}] / \text{mmol dm}^{-3}$ | $[\text{CN}^-] / \text{mmol dm}^{-3}$ | $[\text{C}_6\text{H}_5\text{S}^-] / \text{mmol dm}^{-3}$ | $k_{\text{obs}} / \text{s}^{-1}$ |
|---------------------------------------|---------------------------------------|----------------------------------------------------------|----------------------------------|
| 0.05                                  | 1.0                                   | 20.0                                                     | 37.8                             |
|                                       | 2.0                                   |                                                          | 43.2                             |
|                                       | 3.0                                   |                                                          | 57.3                             |
|                                       | 4.0                                   |                                                          | 68.3                             |
|                                       | 5.0                                   |                                                          | 73.2                             |
|                                       | 6.0                                   |                                                          | 78.8                             |
|                                       | 7.5                                   |                                                          | 81.2                             |
|                                       | 10.0                                  |                                                          | 86.8                             |
| 0.05                                  | 2.0                                   | 0.0                                                      | 28.0                             |
|                                       |                                       |                                                          | 29.2                             |

1.0 36.3  
33.8

**TABLE 3 (continued)**

| [MoCu] / mmol dm <sup>-3</sup> | [CN <sup>-</sup> ] / mmol dm <sup>-3</sup> | [C <sub>6</sub> H <sub>5</sub> S <sup>-</sup> ] / mmol dm <sup>-3</sup> | <i>k</i> <sub>obs</sub> / s <sup>-1</sup> |
|--------------------------------|--------------------------------------------|-------------------------------------------------------------------------|-------------------------------------------|
| 0.05                           | 2.0                                        | 3.0                                                                     | 37.3                                      |
|                                |                                            |                                                                         | 38.2                                      |
|                                |                                            | 5.0                                                                     | 52.2                                      |
|                                |                                            |                                                                         | 55.4                                      |
|                                |                                            | 10.0                                                                    | 60.0                                      |
|                                |                                            |                                                                         | 64.0                                      |
|                                |                                            | 20.0                                                                    | 70.3                                      |
|                                |                                            |                                                                         | 69.2                                      |
|                                |                                            | 30.0                                                                    | 69.2                                      |
|                                |                                            |                                                                         | 69.5                                      |
