# Supplementary material for: Kinetics of the reactions between [S2MoS2Cu(SC6H4R-4)]2–(R = MeO, H, Cl or NO2) and CN–: substitution mechanism at a 3-coordinate CuI site
Source: Royal Society of Chemistry journal article supplement (doi:10.1039/b508389c), 2005-01-01

### SUPPLEMENTARY FIGURE

Eyring plot showing the effect of temperature on the  $k_1^H$  (●) and  $k_2^H$  (▲) pathways for the reaction of  $[\text{S}_2\text{MoS}_2\text{Cu}(\text{SC}_6\text{H}_5)]^{2-}$  with  $\text{CN}^-$  in MeCN at 25.0 °C.

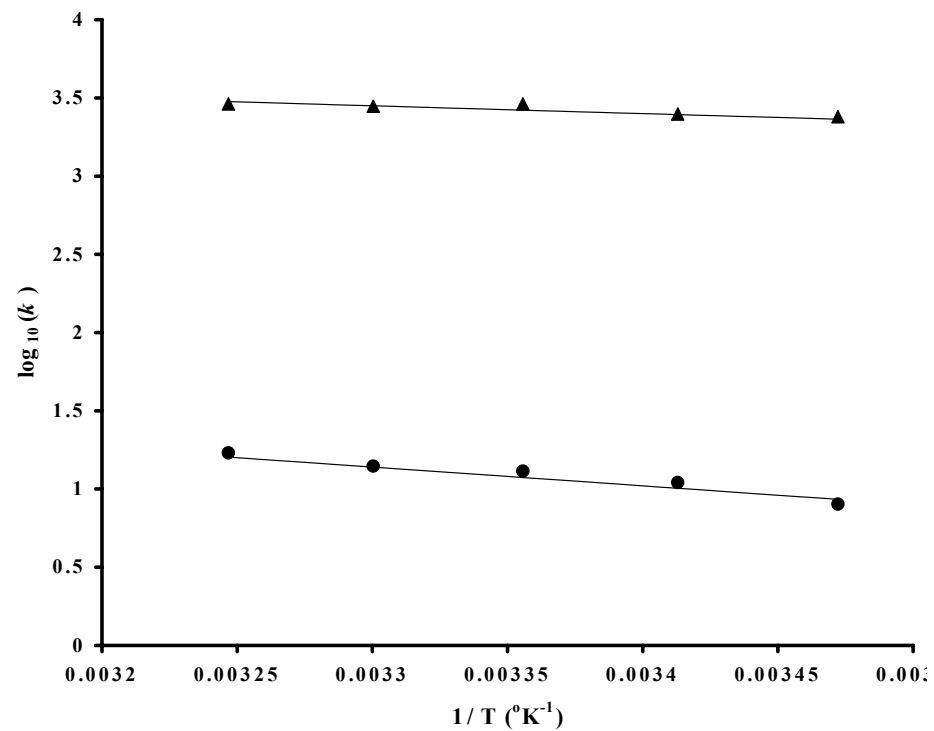

Supplement: b508389c-2.pdf [file b508389c-2.pdf]
